# Supplementary material for: Fractal analysis of pre-reduced Pt/TiO2catalysts for formaldehyde oxidation
Source: Royal Society of Chemistry journal article supplement (doi:10.1039/c7ra02161e), 2017-01-01
Supplement: c7ra02161e1.pdf [file c7ra02161e1.pdf]

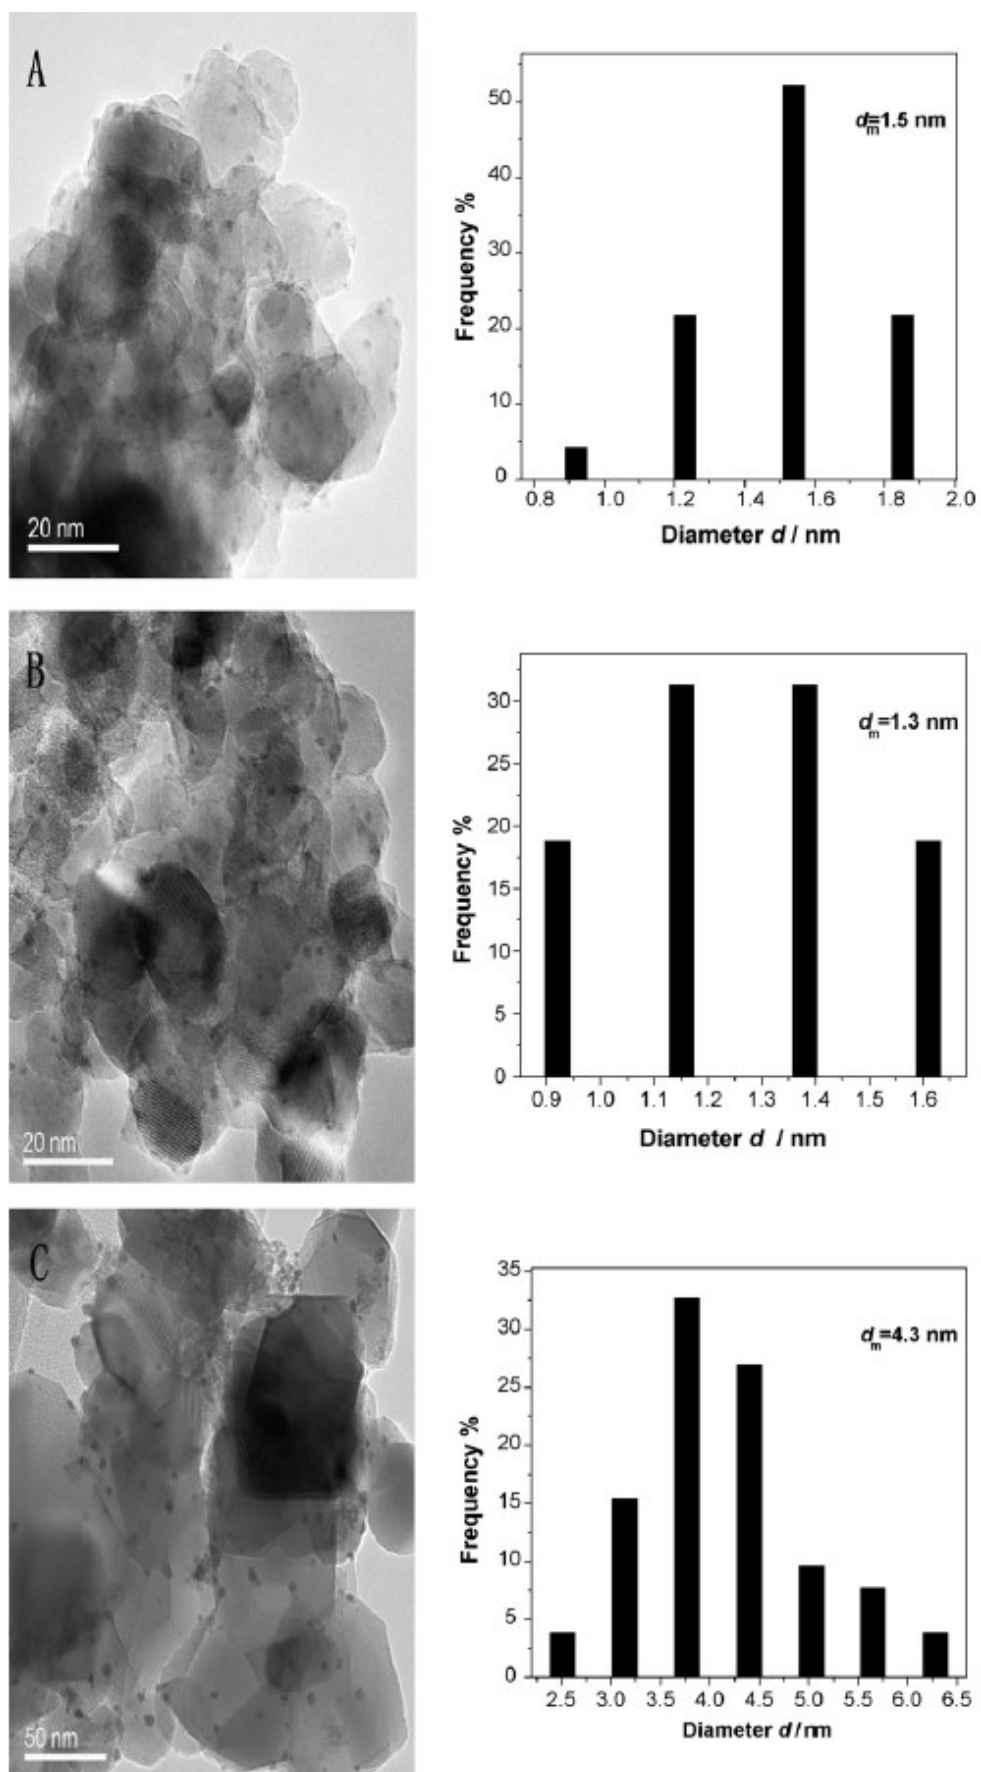

Fig. 1s. TEM images and statistical histograms of Pt/TiO<sub>2</sub> pre-reduced at different temperatures.

(A) 300 °C; (B) 450 °C; (C)700 °C

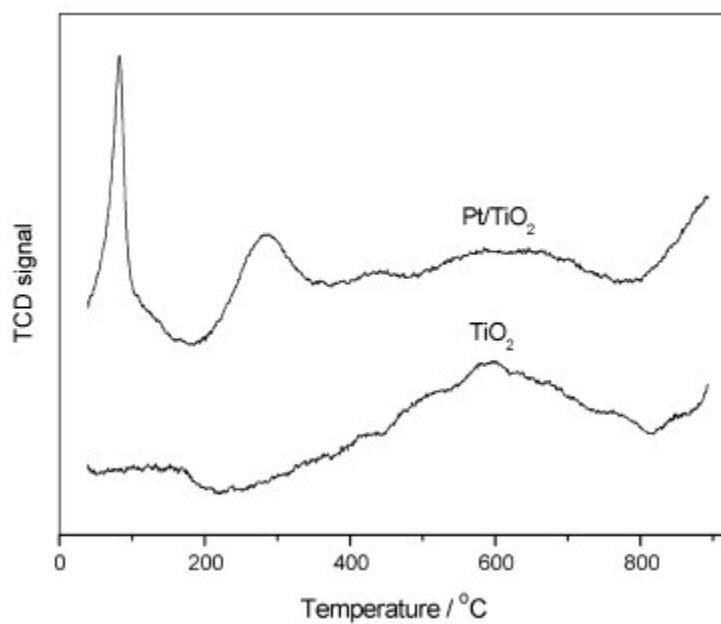

Fig. 2S. H<sub>2</sub>-TPR profiles of Pt/TiO<sub>2</sub> and pure TiO<sub>2</sub>

Table 1s. The crystal size, dispersion and composition of the Pt/TiO<sub>2</sub> pre-reduced at different temperatures

| Pre-reduced temperature (°C)       |         | 300  | 450  | 700  |
|------------------------------------|---------|------|------|------|
| Content (wt.%)                     | Anatase | 100  | 100  | 100  |
|                                    | Rutile  | 0    | 0    | 0    |
| Pt dispersion (%)                  |         | 60.6 | 68.5 | 24.2 |
| Pt particle size <sup>a</sup> (nm) |         | 1.7  | 1.5  | 4.1  |
| Pt particle size <sup>b</sup> (nm) |         | 1.5  | 1.3  | 4.3  |

<sup>a</sup> Obtained from H<sub>2</sub> chemisorption

<sup>b</sup> Obtained from TEM images
